# Supplementary material
Source: publisher figshare collection journal article supplement (https://adisjournals.figshare.com/ndownloader/files/35949293)
Supplement: Supplementary file 1 [file 35949293]

## Tixagevimab + Cilgavimab: Adis Evaluation

### Key Points

- An IM long-acting monoclonal antibody combination developed by AstraZeneca for the prevention and treatment of COVID-19
- Received its first approval on 17 March 2022 in the UK and on 25 March 2022 in the EU
- Approved in the UK for pre-exposure prophylaxis of COVID-19 in adults who are not currently infected with SARS-CoV-2 and who have not had a known recent exposure to an individual infected with SARS-CoV-2 and who are unlikely to mount an adequate immune response to COVID-19 vaccination or for whom COVID-19 vaccination is not recommended. Approved in the EU for the prevention of COVID-19 in adults and adolescents aged  $\geq 12$  years and weighing  $\geq 40$  kg

### Summary

Tixagevimab 150 mg and cilgavimab 150 mg (EVUSHELD™ 150 mg + 150 mg solution for injection; tixagevimab + cilgavimab) is an intramuscular (IM) long-acting monoclonal antibody combination developed by AstraZeneca for the prevention and treatment of COVID-19.

In March 2022, tixagevimab + cilgavimab was approved in the UK for pre-exposure prophylaxis of COVID-19 in adults who are not currently infected with SARS-CoV-2 and who have not had a known recent exposure to an individual infected with SARS-CoV-2 and who are unlikely to mount an adequate immune response to COVID-19 vaccination or for whom COVID-19 vaccination is not recommended, and in the EU for the prevention of COVID-19 in adults and adolescents aged  $\geq 12$  years and weighing  $\geq 40$  kg. In December 2021, tixagevimab + cilgavimab was granted Emergency Use Authorization by the US FDA for the pre-exposure prophylaxis of COVID-19 in adults and paediatric individuals ( $\geq 12$  years of age and weighing  $\geq 40$  kg).

This summary represents the opinions of the author. For a full list of declarations, including funding and author disclosure statements, please see the full text online. © Springer Nature Switzerland AG 2022.
